# Supplementary material for: Atmospheric Radiation Measurement (ARM) airborne field campaign data products between 2013 and 2018
Source: Copernicus journal article supplement (doi:10.5194/essd-2024-97), 2024-06-27
Supplement: Supplementary file 1 [file essd-2024-97-supplement.zip]

## Figure and Tables

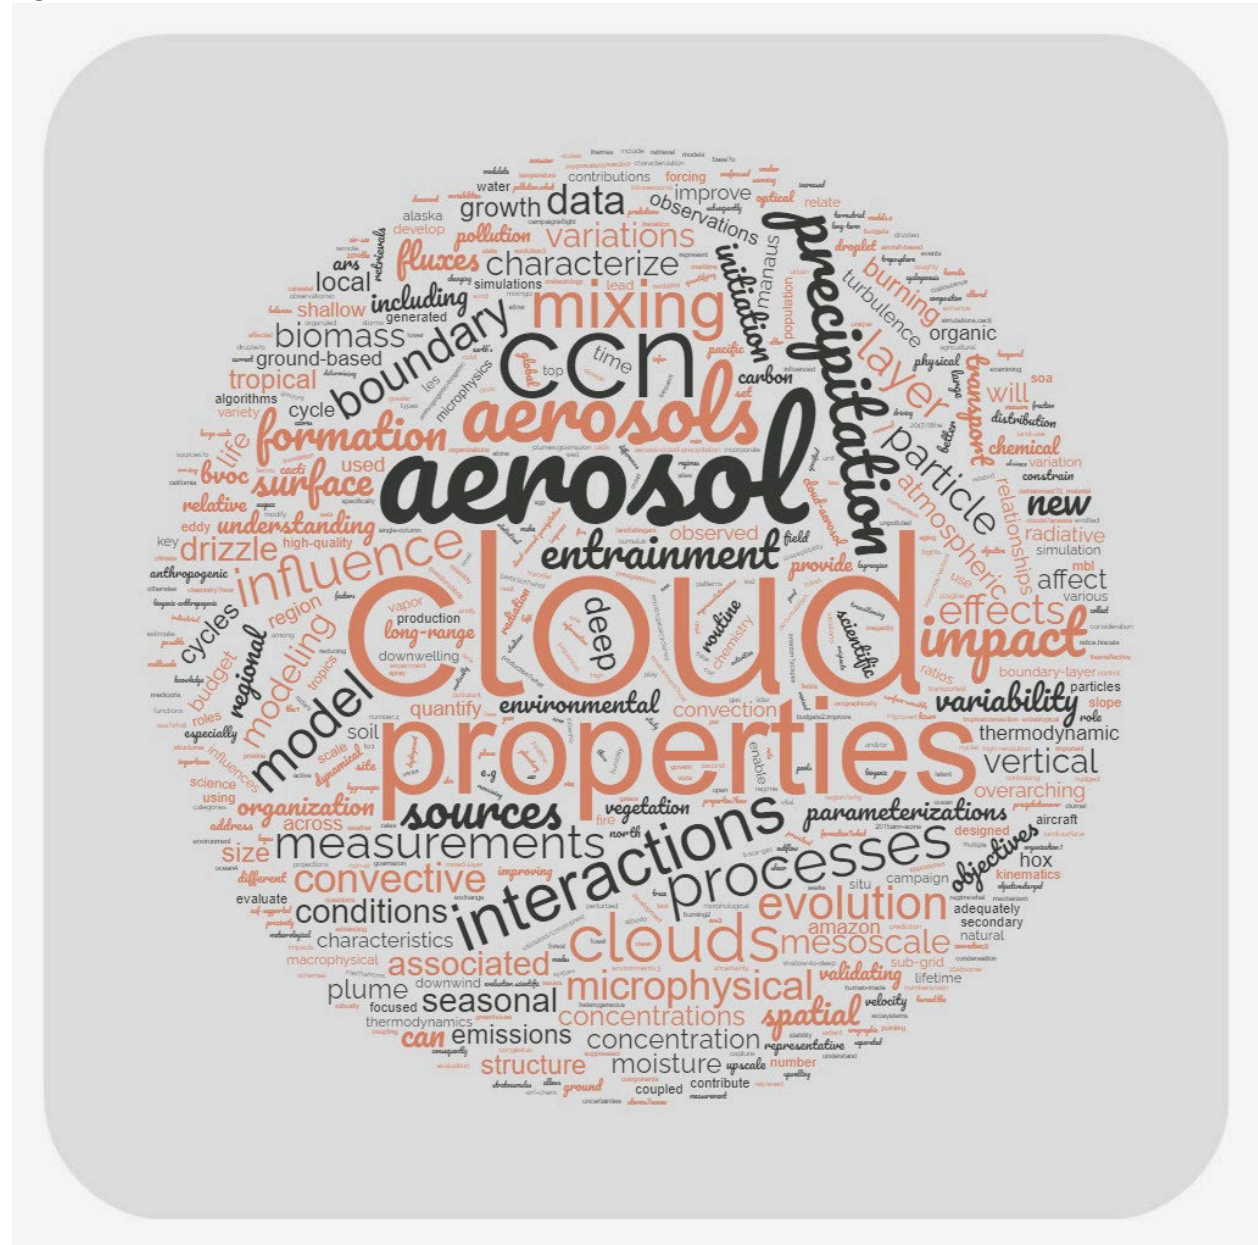

Figure S1. Wordcloud of the science themes based on the AAF-supported seven field campaign between 2013-2018.

Table S1. Information about the merged AAF data product.

| Variables/ Input file names                                 | Units             | Instruments                                                           |
|-------------------------------------------------------------|-------------------|-----------------------------------------------------------------------|
| <a href="#">aaf2dsh_c1</a> [aaf2dsh.c1]                     |                   | 2-Dimensional Stereo Probe (2D-S) , H channel                         |
| twodsh_alt(time)                                            | m                 |                                                                       |
| twodsh_lat(time)                                            | degree_N          |                                                                       |
| twodsh_lon(time)                                            | degree_E          |                                                                       |
| twodsh_number_concentration(time, aaf2dsh_optical_diameter) | count/L/um        |                                                                       |
| twodsh_total_number_concentration(time)                     | count/L           |                                                                       |
| <a href="#">aaf2dsv_c1</a> [aaf2dsv.c1]                     |                   | 2-Dimensional Stereo Probe (2D-S) , V channel                         |
| twodsv_alt(time)                                            | m                 |                                                                       |
| twodsv_lat(time)                                            | degree_N          |                                                                       |
| twodsv_lon(time)                                            | degree_E          |                                                                       |
| twodsv_number_concentration(time, aaf2dsv_optical_diameter) | count/L/um        |                                                                       |
| twodsv_total_number_concentration(time)                     | count/L           |                                                                       |
| <a href="#">aafams_b1</a> [aafams.b1]                       |                   | High-Resolution Time-of-flight Aerosol Mass Spectrometer (HR-ToF-AMS) |
| ams_CVI_enhancement_factor(time)                            | 1                 |                                                                       |
| ams_Ch1(time)                                               | ug/m <sup>3</sup> |                                                                       |
| ams_Ch1_err(time)                                           | ug/m <sup>3</sup> |                                                                       |
| ams_NH4(time)                                               | ug/m <sup>3</sup> |                                                                       |
| ams_NH4_err(time)                                           | ug/m <sup>3</sup> |                                                                       |
| ams_NO3(time)                                               | ug/m <sup>3</sup> |                                                                       |
| ams_NO3_err(time)                                           | ug/m <sup>3</sup> |                                                                       |
| ams_Org(time)                                               | ug/m <sup>3</sup> |                                                                       |
| ams_Org_err(time)                                           | ug/m <sup>3</sup> |                                                                       |
| ams_SO4(time)                                               | ug/m <sup>3</sup> |                                                                       |
| ams_SO4_err(time)                                           | ug/m <sup>3</sup> |                                                                       |
| ams_alt(time)                                               | m                 |                                                                       |
| ams_flag(time)                                              | 1                 |                                                                       |
| ams_lat(time)                                               | degree_N          |                                                                       |
| ams_lon(time)                                               | degree_E          |                                                                       |
| <a href="#">aafccn2cola_b1</a> [aafccn2cola.b1]             |                   | Dual-Column Cloud Condensation Nuclei Counter (CCN) , Column A        |
| ccna_N_CCN(time)                                            | 1/cm <sup>3</sup> |                                                                       |
| ccna_P_sample(time)                                         | hPa               |                                                                       |
| ccna_T_inlet(time)                                          | degC              |                                                                       |
| ccna_T_sample(time)                                         | degC              |                                                                       |
| ccna_alt(time)                                              | m                 |                                                                       |
| ccna_lat(time)                                              | degree_N          |                                                                       |
| ccna_lon(time)                                              | degree_E          |                                                                       |
| ccna_supersaturation_calculated(time)                       | %                 |                                                                       |

|                                                           |            |                                                                                                                            |
|-----------------------------------------------------------|------------|----------------------------------------------------------------------------------------------------------------------------|
| ccna_temp_unstable(time)                                  | unitless   |                                                                                                                            |
| <a href="#">aafcnc2colb_b1[aafcnc2colb.b1]</a>            |            | Dual-Column Cloud Condensation Nuclei Counter (CCN) , Column B                                                             |
| ccnb_N_CCN(time)                                          | 1/cm^3     |                                                                                                                            |
| ccnb_P_sample(time)                                       | hPa        |                                                                                                                            |
| ccnb_T_inlet(time)                                        | degC       |                                                                                                                            |
| ccnb_T_sample(time)                                       | degC       |                                                                                                                            |
| ccnb_alt(time)                                            | m          |                                                                                                                            |
| ccnb_lat(time)                                            | degree N   |                                                                                                                            |
| ccnb_lon(time)                                            | degree E   |                                                                                                                            |
| ccnb_supersaturation_calculated(time)                     | %          |                                                                                                                            |
| ccnb_temp_unstable(time)                                  | unitless   |                                                                                                                            |
| <a href="#">aafcpcfcvi_a1[aafcpcfcvi.a1]</a>              |            | Condensation Particle Counter (CPC), Model 3772, after CVI inlet, a1 level data                                            |
| aafcpcfcvi_concentration(time)                            | 1/cm^3     | Condensation Particle Counter (CPC), Model 3772, after CVI inlet, b1 level data (preferred data if available)              |
| <a href="#">aafcpcfcvi_b1[aafcpcfcvi.b1]</a>              |            |                                                                                                                            |
| cpcfcvi_alt(time)                                         | m          |                                                                                                                            |
| cpcfcvi_concentration(time)                               | 1/cm^3     |                                                                                                                            |
| cpcfcvi_lat(time)                                         | degree N   |                                                                                                                            |
| cpcfcvi_lon(time)                                         | degree E   | Condensation Particle Counter (CPC), Model 3772, after ISOK inlet, a1 level data                                           |
| <a href="#">aafcpcfiso_a1[aafcpcfiso.a1]</a>              |            |                                                                                                                            |
| aafcpcfiso_concentration(time)                            | 1/cm^3     | Condensation Particle Counter (CPC), Model 3772, after ISOK inlet, b1 level data (preferred data if available)             |
| <a href="#">aafcpcfiso_b1[aafcpcfiso.b1]</a>              |            |                                                                                                                            |
| cpcfiso_alt(time)                                         | m          |                                                                                                                            |
| cpcfiso_concentration(time)                               | 1/cm^3     |                                                                                                                            |
| cpcfiso_lat(time)                                         | degree N   |                                                                                                                            |
| cpcfiso_lon(time)                                         | degree E   | Ultrafine Condensation Particle Counter (UCPC), Model 3025A, after ISOK inlet, a1 level data                               |
| <a href="#">aafcpcu_a1[aafcpcu.a1]</a>                    |            |                                                                                                                            |
| aafcpcu_concentration(time)                               | 1/cm^3     | Ultrafine Condensation Particle Counter (UCPC), Model 3025A, after ISOK inlet, b1 level data (preferred data if available) |
| <a href="#">aafcpcu_b1[aafcpcu.b1]</a>                    |            |                                                                                                                            |
| cpcu_alt(time)                                            | m          |                                                                                                                            |
| cpcu_concentration(time)                                  | 1/cm^3     |                                                                                                                            |
| cpcu_lat(time)                                            | degree N   |                                                                                                                            |
| cpcu_lon(time)                                            | degree E   | Fast-Cloud Droplet Probe (F-CDP)                                                                                           |
| <a href="#">aaffcdp_c1[aaffcdp.c1]</a>                    |            |                                                                                                                            |
| fcdp_alt(time)                                            | m          |                                                                                                                            |
| fcdp_lat(time)                                            | degree N   |                                                                                                                            |
| fcdp_lon(time)                                            | degree E   |                                                                                                                            |
| fcdp_number_concentration(time, aaffcdp_optical_diameter) | count/L/um |                                                                                                                            |
| fcdp_total_number_concentration(time)                     | count/L    |                                                                                                                            |
| <a href="#">aaffims_b1[aaffims.b1]</a>                    |            |                                                                                                                            |

|                                                                     |                   |                                                           |
|---------------------------------------------------------------------|-------------------|-----------------------------------------------------------|
| fims_alt(time)                                                      | m                 | Fast Integrated Mobility Spectrometer (FIMS)              |
| fims_geometric_diameter_bounds(fims_geometric_diameter, bound)      | nm                |                                                           |
| fims_heated_flag(time)                                              | 1                 |                                                           |
| fims_lat(time)                                                      | degree N          |                                                           |
| fims_lon(time)                                                      | degree E          |                                                           |
| fims_number_concentration(time, fims_geometric_diameter)            | 1/cm <sup>3</sup> |                                                           |
| fims_pressure(time)                                                 | hPa               |                                                           |
| fims_temperature(time)                                              | degC              |                                                           |
| <a href="#">aafhvs_c1[aafhvs.c1]</a>                                |                   | High Volume Precipitation Spectrometer Version 3 (HVPS-3) |
| hvps_alt(time)                                                      | m                 |                                                           |
| hvps_lat(time)                                                      | degree N          |                                                           |
| hvps_lon(time)                                                      | degree E          |                                                           |
| hvps_number_concentration(time, aafhvs_optical_diameter)            | count/L/um        |                                                           |
| hvps_total_number_concentration(time)                               | count/L           |                                                           |
| <a href="#">aafinletcvi_c1[aafinletcvi.c1]</a>                      |                   | Counterflow Virtual Impactor (CVI) Inlet                  |
| inletcvi_alt(time)                                                  | m                 |                                                           |
| inletcvi_cvi_cut_size(time)                                         | um                |                                                           |
| inletcvi_enhancement_factor(time)                                   | 1                 |                                                           |
| inletcvi_inlet_dilution_factor(time)                                | 1                 |                                                           |
| inletcvi_inlet_selector(time)                                       | 1                 |                                                           |
| inletcvi_lat(time)                                                  | degree N          |                                                           |
| inletcvi_lon(time)                                                  | degree E          |                                                           |
| <a href="#">aafinletisok_a1[aafinletisok.a1]</a>                    |                   | Aerosol Isokinetic Inlet                                  |
| inletisok_cabin_temperature(time)                                   | degC              |                                                           |
| inletisok_pressure_isok_inlet(time)                                 | hPa               |                                                           |
| inletisok_relative_humidity_isok_inlet(time)                        | %                 |                                                           |
| inletisok_temperature_isok_inlet(time)                              | degC              |                                                           |
| <a href="#">aafmergedaerosolsd_c1[aafmergedaerosolsd.c1]</a>        |                   | Merged aerosol size distribution (preferred)              |
| aerosolsd_alt(time)                                                 | m                 |                                                           |
| aerosolsd_cas_flag(time)                                            | 1                 |                                                           |
| aerosolsd_cloud_flag(time)                                          | 1                 |                                                           |
| aerosolsd_cvi_flag(time)                                            | 1                 |                                                           |
| aerosolsd_fcdp_flag(time)                                           | 1                 |                                                           |
| aerosolsd_fims_flag(time)                                           | 1                 |                                                           |
| aerosolsd_geometric_diameter_bounds(merged_optical_diameter, bound) | nm                |                                                           |
| aerosolsd_lat(time)                                                 | degree N          |                                                           |

|                                                                     |            |                                                                                   |
|---------------------------------------------------------------------|------------|-----------------------------------------------------------------------------------|
| aerosolsd_lon(time)                                                 | degree_E   |                                                                                   |
| aerosolsd_number_concentration(time, merged_geometric_diameter)     | 1/cm^3     |                                                                                   |
| aerosolsd_optical_diameter_bounds(merged_geometric_diameter, bound) | um         |                                                                                   |
| aerosolsd_pcaspl_flag(time)                                         | 1          |                                                                                   |
| <a href="#">aafmergedcldsd_c1[aafmergedcldsd.c1]</a>                |            | Merged cloud size distribution (preferred)                                        |
| cldsd_alt(time)                                                     | m          |                                                                                   |
| cldsd_lat(time)                                                     | degree_N   |                                                                                   |
| cldsd_lon(time)                                                     | degree_E   |                                                                                   |
| cldsd_number_concentration(time, cldsd_optical_diameter)            | count/L/um |                                                                                   |
| cldsd_optical_diameter_bounds(cldsd_optical_diameter, bound)        | um         |                                                                                   |
| cldsd_total_number_concentration(time)                              | count/L    |                                                                                   |
| <a href="#">aafnaviwc_c1[aafnaviwc.c1]</a>                          |            | Multiple sensors from the atmospheric state and aircraft state session in Table 2 |
| alt(time)                                                           | m          |                                                                                   |
| ambient_temp(time)                                                  | degC       |                                                                                   |
| angle_of_attack(time)                                               | degree     |                                                                                   |
| cabin_pressure(time)                                                | hPa        |                                                                                   |
| cabin_temperature(time)                                             | degC       |                                                                                   |
| dewpoint_temperature(time)                                          | degC       |                                                                                   |
| dynamic_pressure(time)                                              | hPa        |                                                                                   |
| ground_speed(time)                                                  | m/s        |                                                                                   |
| indicated_airspeed(time)                                            | m/s        |                                                                                   |
| lat(time)                                                           | degree_N   |                                                                                   |
| leg_number(time)                                                    | unitless   |                                                                                   |
| lon(time)                                                           | degree_E   |                                                                                   |
| pitch(time)                                                         | degree     |                                                                                   |
| potential_temperature(time)                                         | degC       |                                                                                   |
| press_alt(time)                                                     | m          |                                                                                   |
| qc_flag(time)                                                       | unitless   |                                                                                   |
| radar_alt(time)                                                     | m          |                                                                                   |
| relative_humidity_ice(time)                                         | %          |                                                                                   |
| relative_humidity_water(time)                                       | %          |                                                                                   |
| roll(time)                                                          | degree     |                                                                                   |
| side_slip(time)                                                     | degree     |                                                                                   |
| solar_zenith_ground(time)                                           | degree     |                                                                                   |
| static_pressure(time)                                               | hPa        |                                                                                   |
| sun_azimuth_aircraft(time)                                          | degree     |                                                                                   |
| sun_azimuth_ground(time)                                            | degree     |                                                                                   |

|                                                             |                    |                                                               |
|-------------------------------------------------------------|--------------------|---------------------------------------------------------------|
| sun_elev_aircraft(time)                                     | degree             |                                                               |
| total_temp(time)                                            | degC               |                                                               |
| true_airspeed(time)                                         | m/s                |                                                               |
| true_heading(time)                                          | degree             |                                                               |
| vert_wind_speed(time)                                       | m/s                |                                                               |
| vertical_velocity(time)                                     | m/s                |                                                               |
| wgs_alt(time)                                               | m                  |                                                               |
| wind_direction(time)                                        | degree             |                                                               |
| wind_speed(time)                                            | m/s                | 3-Wavelength Integrating<br>Nephelometer, Model 3563          |
| <a href="#">aafneph_b1[aafneph.b1]</a>                      |                    |                                                               |
| neph_Bbs_B(time)                                            | 1/Mm               |                                                               |
| neph_Bbs_G(time)                                            | 1/Mm               |                                                               |
| neph_Bbs_R(time)                                            | 1/Mm               |                                                               |
| neph_Bs_B(time)                                             | 1/Mm               |                                                               |
| neph_Bs_G(time)                                             | 1/Mm               |                                                               |
| neph_Bs_R(time)                                             | 1/Mm               |                                                               |
| neph_P_sample(time)                                         | hPa                |                                                               |
| neph_RH_sample(time)                                        | %                  |                                                               |
| neph_T_inlet(time)                                          | degC               |                                                               |
| neph_T_sample(time)                                         | degC               | O3 - Model 49i                                                |
| <a href="#">aafo3_c1[aafo3.c1]</a>                          |                    |                                                               |
| o3_alt(time)                                                | m                  |                                                               |
| o3_lat(time)                                                | degree N           |                                                               |
| o3_lon(time)                                                | degree E           |                                                               |
| o3_o3(time)                                                 | ppbv               | Passive Cavity Aerosol<br>Spectrometer-100X (PCASP)           |
| <a href="#">aafpcasp_a1[aafpcasp.a1]</a>                    |                    |                                                               |
| pcasp_sample_flow_rate(time)                                | cm <sup>3</sup> /s |                                                               |
| pcasp_sheath_flow_rate(time)                                | cm <sup>3</sup> /s |                                                               |
| pcasp_size_distribution(time,<br>aafpcasp_optical_diameter) | count/s            | 3-Wavelength Particle<br>Soot/Absorption Photometer<br>(PSAP) |
| <a href="#">aafpsap1s_b1[aafpsap1s.b1]</a>                  |                    |                                                               |
| psap_Ba_B_Weiss(time)                                       | 1/Mm               |                                                               |
| psap_Ba_B_raw(time)                                         | 1/Mm               |                                                               |
| psap_Ba_G_Weiss(time)                                       | 1/Mm               |                                                               |
| psap_Ba_G_raw(time)                                         | 1/Mm               |                                                               |
| psap_Ba_R_Weiss(time)                                       | 1/Mm               |                                                               |
| psap_Ba_R_raw(time)                                         | 1/Mm               |                                                               |
| psap_alt(time)                                              | m                  |                                                               |
| psap_lat(time)                                              | degree N           |                                                               |
| psap_lon(time)                                              | degree E           | SO2 - Model 43i                                               |
| <a href="#">aafso2_c1[aafso2.c1]</a>                        |                    |                                                               |

|                                                  |            |                                                     |
|--------------------------------------------------|------------|-----------------------------------------------------|
| so2_alt(time)                                    | m          |                                                     |
| so2_lat(time)                                    | degree N   |                                                     |
| so2_lon(time)                                    | degree E   |                                                     |
| so2_so2(time)                                    |            |                                                     |
| <a href="#">aafsp2rbc10s_c1[aafsp2rbc10s.c1]</a> |            | Single Particle Soot Photometer (SP2)               |
| sp2_N_dN_rBC(time, diameter_geo)                 | count/cm^3 |                                                     |
| sp2_alt(time)                                    | m          |                                                     |
| sp2_diameter_geo_bounds(diameter_geo, bound)     | um         |                                                     |
| sp2_lat(time)                                    | degree N   |                                                     |
| sp2_lon(time)                                    | degree E   |                                                     |
| sp2_rBC(time)                                    |            |                                                     |
| <a href="#">aafuhsas_a1[aafuhsas.a1]</a>         |            | Ultra-High Sensitivity Aerosol Spectrometer (UHSAS) |
| uhsas_flow(time)                                 | cc/min     |                                                     |
| uhsas_lower_size_limit(bin_number)               | nm         |                                                     |
| uhsas_sample_flow_rate(time)                     | cc/min     |                                                     |
| uhsas_sample_pressure(time)                      | kPa        |                                                     |
| uhsas_sheath_flow(time)                          | cc/min     |                                                     |
| uhsas_size_distribution(time, bin_number)        | count      |                                                     |

Table S2. Information of the data availability for each field campaign (green: data available; yellow: N/A).

| Measurement | datastream            | CACTI | ACE-ENA | HI-SCALE | ACAPEX | ACME-V | GoAmazon | BBOP |
|-------------|-----------------------|-------|---------|----------|--------|--------|----------|------|
| Meteorology | aafnaviwc.c1          |       |         |          |        |        |          |      |
|             | aafdewpoint.a1        |       |         |          |        |        |          |      |
| Cloud       | aaf2dsh.c1            |       |         |          |        |        |          | N/A  |
|             | aaf2dsv.c1            |       |         |          |        |        |          | N/A  |
|             | aaffcdp.c1            |       |         |          |        |        |          | N/A  |
|             | aafhyps.c1            |       |         |          |        |        |          | N/A  |
|             | aafmergedaerosolsd.c1 |       |         |          | N/A    | N/A    | N/A      | N/A  |
| Aerosol     | aafccn2cola.b1        |       |         |          |        |        |          |      |
|             | aafccn2colb.b1        |       |         |          |        |        |          |      |
|             | aafinletcvi.c1        |       |         |          |        | N/A    | N/A      | N/A  |
|             | aafinletisok.a1       |       |         |          |        | N/A    | N/A      | N/A  |
|             | aafcpcfcvi.b1         |       |         |          |        |        |          |      |
|             | aafcpcfiso.b1         |       |         |          |        |        |          |      |
|             | aafcpcu.b1            |       |         |          |        |        |          |      |
|             | aafneph.b1            |       |         | N/A      |        |        |          |      |
|             | aafpsap.b1            |       |         | N/A      |        |        |          |      |
|             | aafuhsas.a1           |       | N/A     |          |        |        |          |      |

|           |                   |     |  |     |     |     |     |     |
|-----------|-------------------|-----|--|-----|-----|-----|-----|-----|
|           | aafpcasp.a1       |     |  |     |     |     |     |     |
|           | aaffims.b1        |     |  |     |     |     |     |     |
|           | aafmergedcldsd.c1 |     |  |     | N/A | N/A | N/A | N/A |
|           | aafams.b1         |     |  |     | N/A | N/A |     | N/A |
| Trace gas | aafso2.a1         |     |  |     | N/A | N/A |     |     |
|           | aafco.a1          | N/A |  |     |     |     |     |     |
|           | aafnox.a1         | N/A |  | N/A | N/A | N/A |     |     |
|           | aafso3.a1         |     |  |     |     | N/A |     |     |
|           | aafsp2rbc10s.c1   |     |  | N/A |     |     |     |     |

Table S3. A reference table of ARM primary measurements corresponding to the CF standard names.

| Primary measurements              | CF standard name                                                              |
|-----------------------------------|-------------------------------------------------------------------------------|
| twodsh_total_number_concentration | number_concentration_of_cloud_liquid_water_particles_in_air                   |
| twodsv_total_number_concentration | number_concentration_of_cloud_liquid_water_particles_in_air                   |
| ams_Ch1                           | mass_concentration_of_chlorine_dry_aerosol_particles_in_air                   |
| ams_NH4                           | mass_concentration_of_ammonium_dry_aerosol_particles_in_air                   |
| ams_Org                           | mass_concentration_of_particulate_organic_matter_dry_aerosol_particles_in_air |
| ams_SO4                           | mass_concentration_of_sulfate_ambient_aerosol_particles_in_air                |
| ams_NO3                           | mass_concentration_of_nitrate_dry_aerosol_particles_in_air                    |
| ccna_N_CCN                        | number_concentration_of_cloud_condensation_nuclei_in_air                      |
| ccnb_N_CCN                        | number_concentration_of_cloud_condensation_nuclei_in_air                      |
| cpcfcvi_concentration             | number_concentration_of_aerosol_particles_in_air                              |
| cpcfiso_concentration             | number_concentration_of_aerosol_particles_in_air                              |
| cpcu_concentration                | number_concentration_of_aerosol_particles_in_air                              |
| fcdp_total)number_concentration   | number_concentration_of_cloud_liquid_water_particles_in_air                   |
| fims_number_concentration         | number_size_distribution_of_aerosol_particles_in_air                          |
| hvps_total_number_concentration   | number_concentration_of_cloud_liquid_water_particles_in_air                   |
| aerosolsd_number_concentration    | atmosphere_number_content_of_aerosol_particles                                |
| cldsd_number_concentration        | number_concentration_of_cloud_liquid_water_particles_in_air                   |
| alt                               | altitude                                                                      |
| ambient_temp                      | air_temperature                                                               |
| dewpoint_temperature              | dew_point_temperature                                                         |
| lat                               | latitude                                                                      |
| lon                               | longitude                                                                     |
| pitch                             | platform_pitch                                                                |
| press_alt                         | barometric_altitude                                                           |
| relative_humidity_water           | relative_humidity                                                             |
| roll                              | platform_roll                                                                 |



|                         |                                                                                          |
|-------------------------|------------------------------------------------------------------------------------------|
| static_pressure         | air_pressure                                                                             |
| vert_wind_speed         | wind_speed                                                                               |
| wind_direction          | wind_from_direction                                                                      |
| wind_speed              | wind_speed                                                                               |
| neph_Bbs_B              | volume_backwards_scattering_coefficient_in_air_due_to_dried_aerosol_particles            |
| neph_Bbs_G              | volume_backwards_scattering_coefficient_in_air_due_to_dried_aerosol_particles            |
| neph_Bbs_R              | volume_backwards_scattering_coefficient_in_air_due_to_dried_aerosol_particles            |
| neph_Bs_B               | volume_scattering_coefficient_of_radiative_flux_in_air_due_to_ambient_aerosol_particles  |
| neph_Bs_G               | volume_scattering_coefficient_of_radiative_flux_in_air_due_to_ambient_aerosol_particles  |
| neph_Bs_R               | volume_scattering_coefficient_of_radiative_flux_in_air_due_to_ambient_aerosol_particles  |
| o3                      | atmosphere_mass_content_of_ozone                                                         |
| psap_Ba_B_Weiss         | mass_concentration_of_absorption_equivalent_black_carbon_of_dry_aerosol_particles_in_air |
| psap_Ba_G_Weiss         | mass_concentration_of_absorption_equivalent_black_carbon_of_dry_aerosol_particles_in_air |
| psap_Ba_R_Weiss         | mass_concentration_of_absorption_equivalent_black_carbon_of_dry_aerosol_particles_in_air |
| so2                     | atmosphere_mass_content_of_sulfur_dioxide                                                |
| sp2_rBC                 | mass_concentration_of_absorption_equivalent_black_carbon_of_dry_aerosol_particles_in_air |
| uhsas_size_distribution | number_size_distribution_of_aerosol_particles_in_air                                     |

### Description of a quickplot script

Users can open and review the data using Panoply, as show in Figure S2.

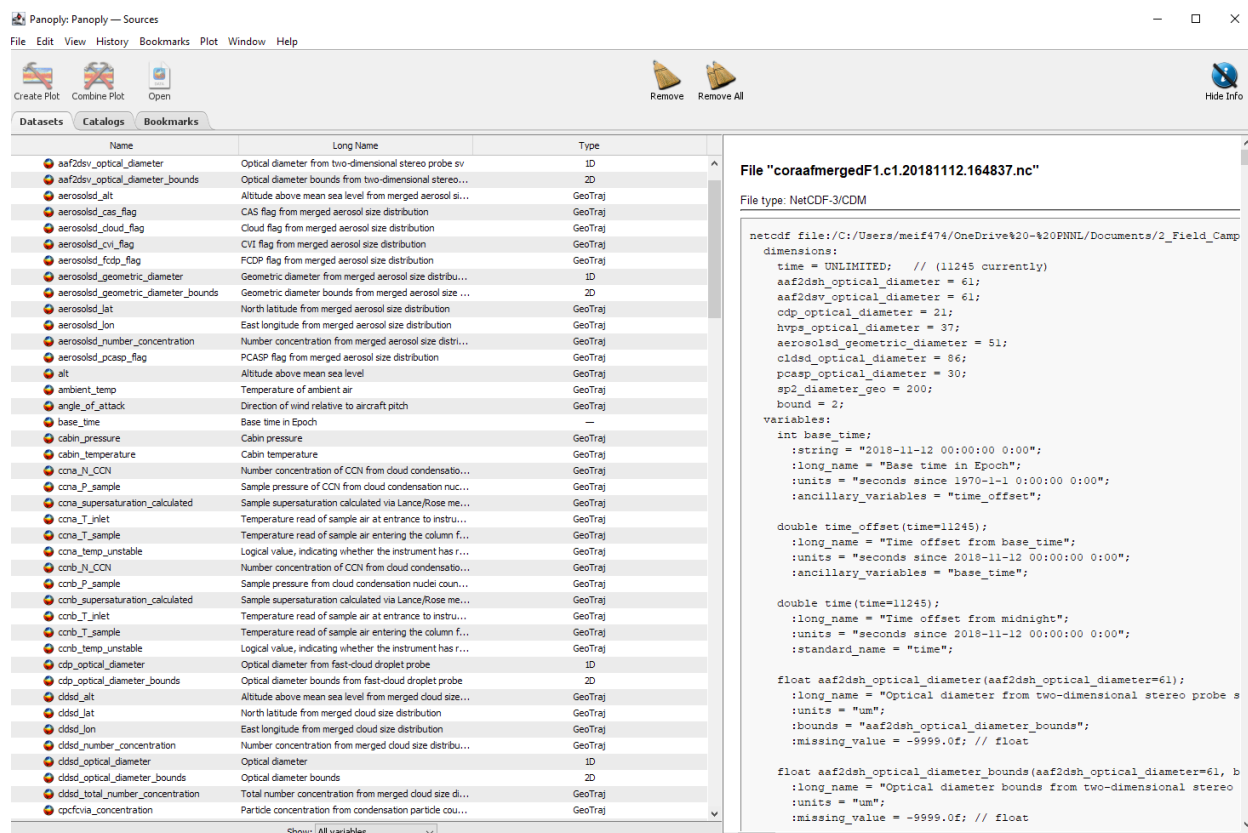

Figure S2. A screenshot of using Panoply to open this netCDF data.

A plotting script has been developed to create quicklook plots (as shown in Fig. S3) for 1D variables. User can request that script by contacting the authors. This script requires 3 input arguments: the directory where input files are located, the name of the input file or a substring to pattern match to identify more than one input file, and a list of all variables to plot.

One example for plotting the variables "twodsv\_total\_number\_concentration and vert\_wind\_speed" for all files in 2018 is below. It assumes the user has setup and activated the aafmerged\_plot conda environment. Please contact authors if you need help to set up conda environment.

```
python3 plot_aafmerged.py -d /data/vap/gaustad/aafmerged/datastream/cor/coraafmergedF1.c1/
-f coraafmergedF1.c1.20181 -v twodsv_total_number_concentration vert_wind_speed
```

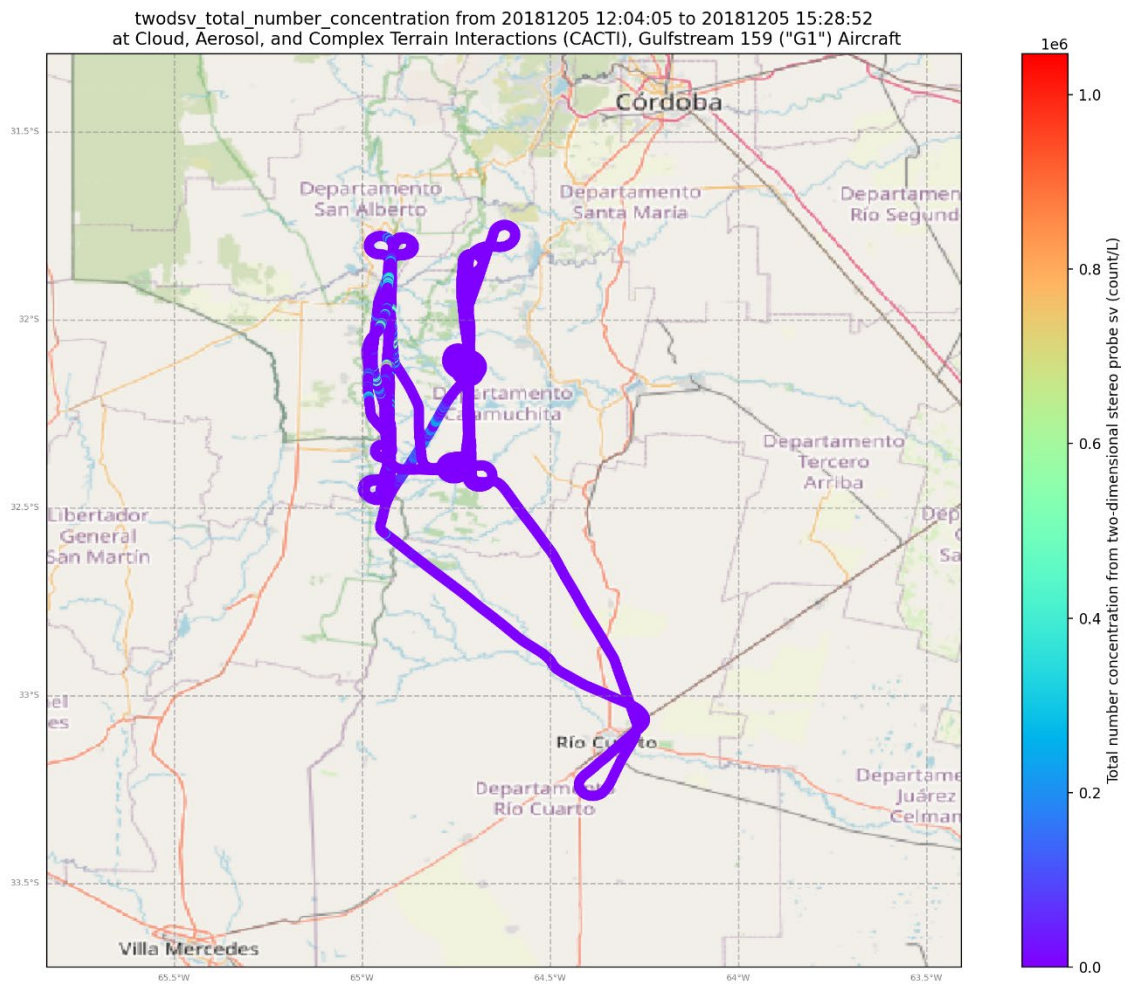

Figure S3. An example quicklook plot.
